# Supplementary material
Source: PubMed Central journal article supplement (PMC6125038)
Supplement: DS_10.1177_2381468317716441.pdf [file DS_10.1177_2381468317716441.pdf]

## Appendix

**Appendix Table 1.** Five health insurance plans drawn from HealthCare.gov.

Includes one plan from each of the five metal categories: catastrophic, bronze, silver, gold, and platinum. For the comprehension survey, participants were asked questions about three plans: catastrophic, bronze, and platinum. For the choice experiment, participants chose from all five plans.

The five plans are included under the table, exactly as depicted on HealthCare.gov and in our study.

| PLAN                                            | Monthly premium (\$) | Estimated total yearly cost (\$) | Deductible (\$) | Out-of-pocket maximum (\$) | Copayments / Coinsurance                                                                                                                                    |
|-------------------------------------------------|----------------------|----------------------------------|-----------------|----------------------------|-------------------------------------------------------------------------------------------------------------------------------------------------------------|
| <b>A: Catastrophic</b><br><i>Lowest premium</i> | 96                   | 8,016                            | 6,850           | 6,850                      | ER: No charge after deductible<br>GDs: No charge after deductible<br>P: \$20<br>S: No charge after deductible                                               |
| <b>B: Bronze</b>                                | 149                  | 8,652                            | 5,500           | 6,850                      | ER: \$250 Copay after deductible<br>GDs: \$20 Copay after deductible<br>P: \$35<br>S: \$75 Copay after deductible                                           |
| <b>C: Silver</b>                                | 182                  | 7,587                            | 3,500           | 5,400                      | ER: \$250 Copay after deductible<br>GDs: \$10<br>P: \$10<br>S: \$60                                                                                         |
| <b>D: Gold</b>                                  | 208                  | 5,991                            | 1,600           | 3,500                      | ER: 10% Coinsurance after deductible<br>GDs: 10% Coinsurance after deductible<br>P: 10% Coinsurance after deductible<br>S: 10% Coinsurance after deductible |
| <b>E: Platinum</b><br><i>Highest premium</i>    | 304                  | 6,156                            | 500             | 2,500                      | ER: \$150<br>GDs: \$4 Copay after deductible<br>P: \$5<br>S: \$10                                                                                           |

ER = Emergency room care

GDs = Generic drugs

P = Primary doctor

S = Specialist doctor

## Plan A: Catastrophic Plan

### Aetna · Coventry Catastrophic Duke Medicine 100%

Catastrophic POS | Plan ID: 61671NC0070015

|                                                                                                                                                                                                                           |                                                                                               |                                                                                                                                                                                                            |
|---------------------------------------------------------------------------------------------------------------------------------------------------------------------------------------------------------------------------|-----------------------------------------------------------------------------------------------|------------------------------------------------------------------------------------------------------------------------------------------------------------------------------------------------------------|
| <b>Estimated monthly premium</b><br><b>\$96</b>                                                                                                                                                                           | <b>Deductible ⓘ</b><br><b>\$6,850</b><br>Estimated Individual Total                           | <b>Out-of-pocket maximum ⓘ</b><br><b>\$6,850</b><br>Estimated Individual Total                                                                                                                             |
| <b>Estimated total yearly costs</b><br>Total premiums for the year \$1,158<br>Deductible, copayments, and other costs \$6,858<br><hr/> Total <b>\$8,016</b><br><br><a href="#">EDIT</a> <a href="#">Understand this ⓘ</a> | <b>Your doctors and prescription drugs</b><br><br><a href="#">EDIT</a> <a href="#">BETA ⓘ</a> | <b>Copayments / Coinsurance ⓘ</b><br>Emergency room care: No Charge After Deductible<br>Generic drugs: No Charge After Deductible<br>Primary doctor: \$20<br>Specialist doctor: No Charge After Deductible |

## Plan B: Bronze Plan

### Aetna · Coventry Bronze \$35 Copay Duke Medicine

Bronze POS | Plan ID: 61671NC0070010

|                                                                                                                                                                                                                           |                                                                                               |                                                                                                                                                                                                                |
|---------------------------------------------------------------------------------------------------------------------------------------------------------------------------------------------------------------------------|-----------------------------------------------------------------------------------------------|----------------------------------------------------------------------------------------------------------------------------------------------------------------------------------------------------------------|
| <b>Estimated monthly premium</b><br><b>\$149</b>                                                                                                                                                                          | <b>Deductible ⓘ</b><br><b>\$5,500</b><br>Estimated Individual Total                           | <b>Out-of-pocket maximum ⓘ</b><br><b>\$6,850</b><br>Estimated Individual Total                                                                                                                                 |
| <b>Estimated total yearly costs</b><br>Total premiums for the year \$1,793<br>Deductible, copayments, and other costs \$6,858<br><hr/> Total <b>\$8,652</b><br><br><a href="#">EDIT</a> <a href="#">Understand this ⓘ</a> | <b>Your doctors and prescription drugs</b><br><br><a href="#">EDIT</a> <a href="#">BETA ⓘ</a> | <b>Copayments / Coinsurance ⓘ</b><br>Emergency room care: \$250 Copay after deductible<br>Generic drugs: \$20 Copay after deductible<br>Primary doctor: \$35<br>Specialist doctor: \$75 Copay after deductible |

## Plan C: Silver Plan

### Aetna · Coventry Silver \$10 Copay Duke Medicine

Silver POS | Plan ID: 61671NC0070008

|                                                                                                                                                                                                                                                                                                                                             |                                                                             |                                                                                        |                                         |         |              |                |                                                                                                      |                                                                                                                                                                                  |
|---------------------------------------------------------------------------------------------------------------------------------------------------------------------------------------------------------------------------------------------------------------------------------------------------------------------------------------------|-----------------------------------------------------------------------------|----------------------------------------------------------------------------------------|-----------------------------------------|---------|--------------|----------------|------------------------------------------------------------------------------------------------------|----------------------------------------------------------------------------------------------------------------------------------------------------------------------------------|
| <p>Estimated monthly premium</p> <p><b>\$182</b></p>                                                                                                                                                                                                                                                                                        | <p>Deductible ⓘ</p> <p><b>\$3,500</b></p> <p>Estimated Individual Total</p> | <p>Out-of-pocket maximum ⓘ</p> <p><b>\$5,400</b></p> <p>Estimated Individual Total</p> |                                         |         |              |                |                                                                                                      |                                                                                                                                                                                  |
| <p>Estimated total yearly costs</p> <table border="0"> <tr> <td>Total premiums for the year</td> <td>\$2,178</td> </tr> <tr> <td>Deductible, copayments, and other costs</td> <td>\$5,408</td> </tr> <tr> <td><b>Total</b></td> <td><b>\$7,587</b></td> </tr> </table> <p><a href="#">EDIT</a></p> <p><a href="#">Understand this ⓘ</a></p> | Total premiums for the year                                                 | \$2,178                                                                                | Deductible, copayments, and other costs | \$5,408 | <b>Total</b> | <b>\$7,587</b> | <p>Your doctors and prescription drugs</p> <p><a href="#">EDIT</a></p> <p><a href="#">BETA ⓘ</a></p> | <p>Copayments / Coinsurance ⓘ</p> <p>Emergency room care: \$250 Copay after deductible</p> <p>Generic drugs: \$10</p> <p>Primary doctor: \$10</p> <p>Specialist doctor: \$60</p> |
| Total premiums for the year                                                                                                                                                                                                                                                                                                                 | \$2,178                                                                     |                                                                                        |                                         |         |              |                |                                                                                                      |                                                                                                                                                                                  |
| Deductible, copayments, and other costs                                                                                                                                                                                                                                                                                                     | \$5,408                                                                     |                                                                                        |                                         |         |              |                |                                                                                                      |                                                                                                                                                                                  |
| <b>Total</b>                                                                                                                                                                                                                                                                                                                                | <b>\$7,587</b>                                                              |                                                                                        |                                         |         |              |                |                                                                                                      |                                                                                                                                                                                  |

## Plan D: Gold Plan

### UnitedHealthcare · Gold Compass HSA 1600

Gold HMO | Plan ID: 54332NC0030003

|                                                                                                                                                                                                                                                                                                                                             |                                                                             |                                                                                        |                                         |         |              |                |                                                                                                      |                                                                                                                                                                                                                                                                          |
|---------------------------------------------------------------------------------------------------------------------------------------------------------------------------------------------------------------------------------------------------------------------------------------------------------------------------------------------|-----------------------------------------------------------------------------|----------------------------------------------------------------------------------------|-----------------------------------------|---------|--------------|----------------|------------------------------------------------------------------------------------------------------|--------------------------------------------------------------------------------------------------------------------------------------------------------------------------------------------------------------------------------------------------------------------------|
| <p>Estimated monthly premium</p> <p><b>\$208</b></p>                                                                                                                                                                                                                                                                                        | <p>Deductible ⓘ</p> <p><b>\$1,600</b></p> <p>Estimated Individual Total</p> | <p>Out-of-pocket maximum ⓘ</p> <p><b>\$3,500</b></p> <p>Estimated Individual Total</p> |                                         |         |              |                |                                                                                                      |                                                                                                                                                                                                                                                                          |
| <p>Estimated total yearly costs</p> <table border="0"> <tr> <td>Total premiums for the year</td> <td>\$2,491</td> </tr> <tr> <td>Deductible, copayments, and other costs</td> <td>\$3,500</td> </tr> <tr> <td><b>Total</b></td> <td><b>\$5,991</b></td> </tr> </table> <p><a href="#">EDIT</a></p> <p><a href="#">Understand this ⓘ</a></p> | Total premiums for the year                                                 | \$2,491                                                                                | Deductible, copayments, and other costs | \$3,500 | <b>Total</b> | <b>\$5,991</b> | <p>Your doctors and prescription drugs</p> <p><a href="#">EDIT</a></p> <p><a href="#">BETA ⓘ</a></p> | <p>Copayments / Coinsurance ⓘ</p> <p>Emergency room care: 10% Coinsurance after deductible</p> <p>Generic drugs: 10% Coinsurance after deductible</p> <p>Primary doctor: 10% Coinsurance after deductible</p> <p>Specialist doctor: 10% Coinsurance after deductible</p> |
| Total premiums for the year                                                                                                                                                                                                                                                                                                                 | \$2,491                                                                     |                                                                                        |                                         |         |              |                |                                                                                                      |                                                                                                                                                                                                                                                                          |
| Deductible, copayments, and other costs                                                                                                                                                                                                                                                                                                     | \$3,500                                                                     |                                                                                        |                                         |         |              |                |                                                                                                      |                                                                                                                                                                                                                                                                          |
| <b>Total</b>                                                                                                                                                                                                                                                                                                                                | <b>\$5,991</b>                                                              |                                                                                        |                                         |         |              |                |                                                                                                      |                                                                                                                                                                                                                                                                          |

## Plan E: Platinum Plan

### Blue Cross and Blue Shield of NC · Blue Value 500 (limited network)

Platinum POS | Plan ID: 11512NC0100021

|                                                                                                                                                                                                                                                                                                                             |                                                                           |                                                                                        |                                         |         |              |                |                                                                                               |                                                                                                                                                                                |
|-----------------------------------------------------------------------------------------------------------------------------------------------------------------------------------------------------------------------------------------------------------------------------------------------------------------------------|---------------------------------------------------------------------------|----------------------------------------------------------------------------------------|-----------------------------------------|---------|--------------|----------------|-----------------------------------------------------------------------------------------------|--------------------------------------------------------------------------------------------------------------------------------------------------------------------------------|
| <p>Estimated monthly premium</p> <p><b>\$304</b></p>                                                                                                                                                                                                                                                                        | <p>Deductible ⓘ</p> <p><b>\$500</b></p> <p>Estimated Individual Total</p> | <p>Out-of-pocket maximum ⓘ</p> <p><b>\$2,500</b></p> <p>Estimated Individual Total</p> |                                         |         |              |                |                                                                                               |                                                                                                                                                                                |
| <p>Estimated total yearly costs</p> <table><tbody><tr><td>Total premiums for the year</td><td>\$3,648</td></tr><tr><td>Deductible, copayments, and other costs</td><td>\$2,508</td></tr><tr><td><b>Total</b></td><td><b>\$6,156</b></td></tr></tbody></table> <p><a href="#">EDIT</a> <a href="#">Understand this ⓘ</a></p> | Total premiums for the year                                               | \$3,648                                                                                | Deductible, copayments, and other costs | \$2,508 | <b>Total</b> | <b>\$6,156</b> | <p>Your doctors and prescription drugs</p> <p><a href="#">EDIT</a> <a href="#">BETA ⓘ</a></p> | <p>Copayments / Coinsurance ⓘ</p> <p>Emergency room care: \$150</p> <p>Generic drugs: \$4 Copay after deductible</p> <p>Primary doctor: \$5</p> <p>Specialist doctor: \$10</p> |
| Total premiums for the year                                                                                                                                                                                                                                                                                                 | \$3,648                                                                   |                                                                                        |                                         |         |              |                |                                                                                               |                                                                                                                                                                                |
| Deductible, copayments, and other costs                                                                                                                                                                                                                                                                                     | \$2,508                                                                   |                                                                                        |                                         |         |              |                |                                                                                               |                                                                                                                                                                                |
| <b>Total</b>                                                                                                                                                                                                                                                                                                                | <b>\$6,156</b>                                                            |                                                                                        |                                         |         |              |                |                                                                                               |                                                                                                                                                                                |

**Appendix Figure 1.** Pop-up definitions of insurance concepts, replicated from HealthCare.gov.

Note: HealthCare.gov does not include a definition for monthly premium. We included this definition to ensure that participants had access to definitions for every insurance concept we tested for comprehension.

**Aetna · Coventry Silver \$...**  
Silver POS | Plan ID: 61671NC0070008

**Estimated monthly premium**  
**\$182**

**Deductible**  
**\$3,500**  
Estimated Individual Total

**Out-of-pocket maximum**  
**\$5,400**  
Estimated Individual Total

**Estimated total yearly costs**  
Total premiums for the year \$2,178  
Deductible, copayments, and other costs \$885  
**Total \$3,063**

**Your doctors and prescription drugs**  
BETA

**Copayments / Coinsurance**  
Emergency room care: \$250 Copay after deductible  
Generic drugs: \$10  
Primary doctor: \$10  
Specialist doctor: \$60

**Callout 1:** The amount that you must pay to be enrolled in your health insurance plan.

**Callout 2:** The amount that you have to pay out-of-pocket each year before the plan pays anything.

**Callout 3:** The most you'll have to pay for covered services in a year, no matter how much care you need. Once you spend this amount, the insurance company pays 100%.

**Callout 4:** This estimate is based on how much care you told us each household member is likely to use. It's useful for comparing plans based on total costs of care, not just monthly premiums. But your actual costs will depend on how much care you wind up using.

**Callout 5:** Copayments: The dollar amount you pay for a covered service after you meet your deductible. Coinsurance: The percentage of cost you pay for a covered service after you meet your deductible.

**Appendix Figure 2.** Estimated Medical Use Profiles drawn from HealthCare.gov

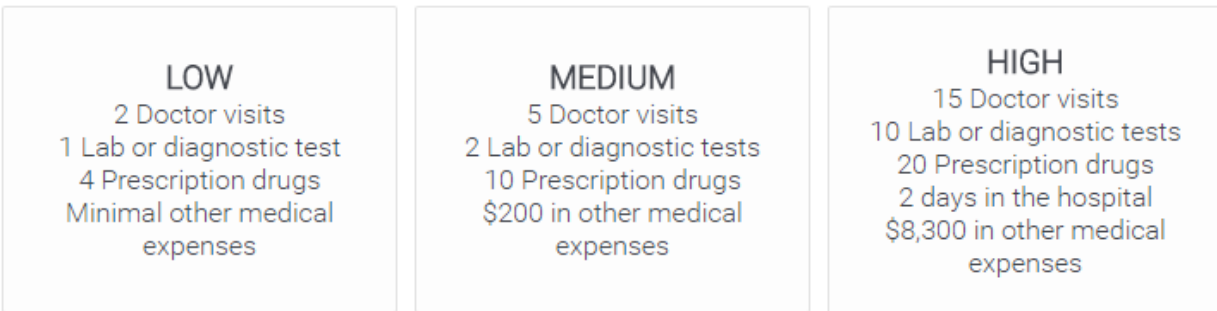

**Appendix Table 2.** Characteristics of Study Participants

| Characteristic                  | Comprehension Survey<br>(n=76) | Choice Experiment<br>(n=298) |
|---------------------------------|--------------------------------|------------------------------|
| <b>Gender (%)</b>               |                                |                              |
| Male                            | 52.6                           | 51.3                         |
| Female                          | 46.1                           | 48.3                         |
| Other                           | 1.3                            | 0.2                          |
| <b>Age</b>                      |                                |                              |
| Mean                            | 32.4                           | 35.3                         |
| Median                          | 29.5                           | 32.0                         |
| (S.D.)                          | (10.3)                         | (11.1)                       |
| [Range]                         | [47]                           | [56]                         |
| <b>Race/Ethnicity (%)</b>       |                                |                              |
| White/Non-Hispanic              | 80.3                           | 80.9                         |
| African American                | 6.6                            | 5.7                          |
| Hispanic/Latino                 | 6.6                            | 3.0                          |
| Asian                           | 3.9                            | 6.4                          |
| Other                           | 2.6                            | 4.0                          |
| <b>Education (%)</b>            |                                |                              |
| < High School                   | 1.3                            | 0.4                          |
| High School Diploma/GED         | 18.4                           | 12.6                         |
| Some College                    | 21.1                           | 22.4                         |
| Associate/technical degree      | 10.5                           | 9.5                          |
| Undergraduate degree            | 40.8                           | 39                           |
| Graduate degree                 | 7.9                            | 16                           |
| <b>Insurance Enrollment (%)</b> |                                |                              |
| Yes, currently                  | 73.7                           | N/A                          |
| No, but yes in past             | 21.2                           | N/A                          |
| No, never                       | 5.3                            | N/A                          |

**Appendix Table 3. Plan Choice Regressions**

|                                 |                          | n=298 Reference group: Low to High Sorting Order |       |        |       |                     | 95% C.I. for EXP(B) |       | R <sup>2</sup> , Model 1 | R <sup>2</sup> , Model 2 | Delta R <sup>2</sup> |
|---------------------------------|--------------------------|--------------------------------------------------|-------|--------|-------|---------------------|---------------------|-------|--------------------------|--------------------------|----------------------|
| Plan A                          | Covariate                | B                                                | S.E.  | Wald   | Sig.  | Exp(B) - Odds ratio | Lower               | Upper |                          |                          |                      |
| Model 1                         | Sorting Order**          | 1.223                                            | 0.332 | 13.589 | 0.000 | <b>3.398**</b>      | 1.773               | 6.512 | 0.087                    | 0.089                    | 0.002                |
|                                 | Numeracy                 | -0.228                                           | 0.157 | 2.120  | 0.145 | 0.796               | 0.585               | 1.082 |                          |                          |                      |
| Model 2 (includes interaction): | Sorting Order x Numeracy | -0.211                                           | 0.333 | 0.404  | 0.525 | 0.809               | 0.422               | 1.554 |                          |                          |                      |
| <b>Plan B</b>                   |                          |                                                  |       |        |       |                     |                     |       | 0.185                    | 0.194                    | 0.009                |
| Model 1                         | Sorting Order**          | -2.021                                           | 0.387 | 27.232 | 0.000 | <b>0.133**</b>      | 0.062               | 0.283 |                          |                          |                      |
|                                 | Numeracy                 | 0.150                                            | 0.167 | 0.807  | 0.369 | 1.162               | 0.837               | 1.612 |                          |                          |                      |
| Model 2 (includes interaction): | Sorting Order x Numeracy | -0.566                                           | 0.395 | 2.054  | 0.152 | 0.568               | 0.262               | 1.231 |                          |                          |                      |
| <b>Plan C</b>                   |                          |                                                  |       |        |       |                     |                     |       | 0.009                    | 0.021                    | 0.012                |
| Model 1                         | Sorting Order            | -0.376                                           | 0.334 | 1.266  | 0.261 | 0.687               | 0.357               | 1.322 |                          |                          |                      |
|                                 | Numeracy                 | -0.068                                           | 0.170 | 0.162  | 0.687 | 0.934               | 0.669               | 1.303 |                          |                          |                      |
| Model 2 (includes interaction): | Sorting Order x Numeracy | -0.488                                           | 0.347 | 1.982  | 0.159 | 0.614               | 0.311               | 1.211 |                          |                          |                      |
| <b>Plan D</b>                   |                          |                                                  |       |        |       |                     |                     |       | 0.114                    | 0.130                    | 0.016                |
| Model 1                         | Sorting Order**          | 1.520                                            | 0.364 | 17.425 | 0.000 | <b>4.572**</b>      | 2.240               | 9.333 |                          |                          |                      |
|                                 | Numeracy                 | 0.076                                            | 0.174 | 0.190  | 0.663 | 1.079               | 0.766               | 1.519 |                          |                          |                      |
| Model 2 (includes interaction): | Sorting Order x Numeracy | 0.630                                            | 0.358 | 3.107  | 0.078 | 1.878               | 0.932               | 3.785 |                          |                          |                      |
| <b>Plan E</b>                   |                          |                                                  |       |        |       |                     |                     |       | 0.006                    | 0.023                    | 0.017                |
| Model 1                         | Sorting Order            | 0.258                                            | 0.252 | 1.049  | 0.306 | 0.773               | 0.471               | 1.266 |                          |                          |                      |
|                                 | Numeracy                 | 0.055                                            | 0.133 | 0.172  | 0.679 | 1.057               | 0.814               | 1.373 |                          |                          |                      |
| Model 2 (includes interaction): | Sorting Order x Numeracy | 0.536                                            | 0.280 | 3.657  | 0.056 | 1.709               | 0.987               | 2.960 |                          |                          |                      |
